# Supplementary material for: Highly Diverse Phytophthora infestans Populations Infecting Potato Crops in Pskov Region, North-West Russia
Source: MDPI journal article supplement (doi:10.3390/jof8050472), 2022-04-30
Supplement: s1 [file s1]

## Supplementary materials

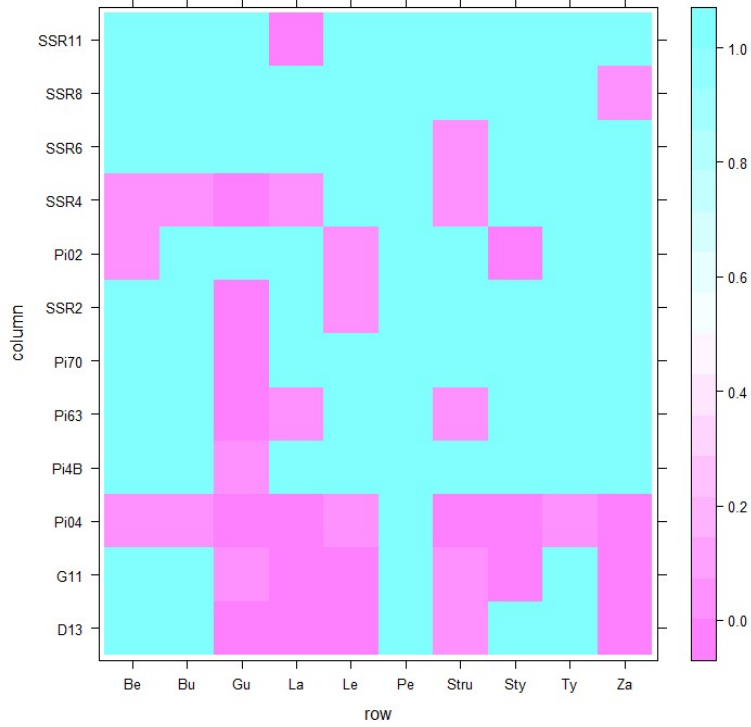

(a)

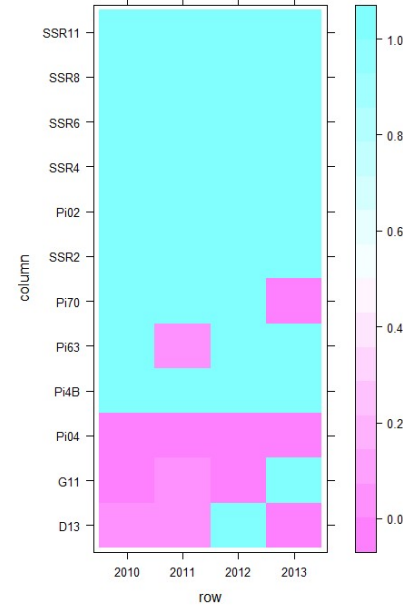

(b)

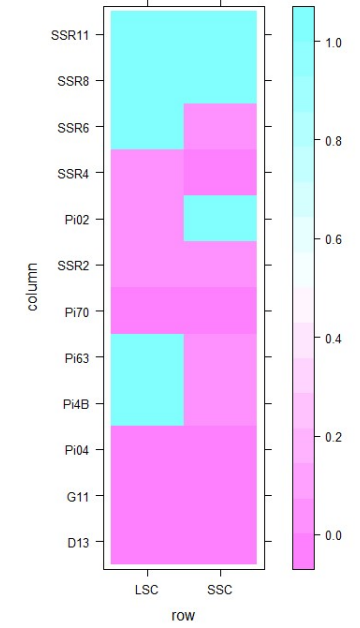

(c)

**Figure S1.** Heatmap showing significant departures of locus from HWE for each location (a), year (b) and agricultural management practices (c), clone-corrected. This simple plot shows us loci in rows and populations in columns. Note, that all loci shown in pink are loci suspected of not being in HWE with  $P \leq 0.05$ . Be: Bereznyuk, Bu: Bulatnovo, Gu: Gusinets, La: Lakomtsevo, Le: Lezgi, Pe: Pechory, Stru: Strugi Krasnye, Sty: Styagly, Ty: Tyamsha, Za: Zatrub'ye-Lebedy.

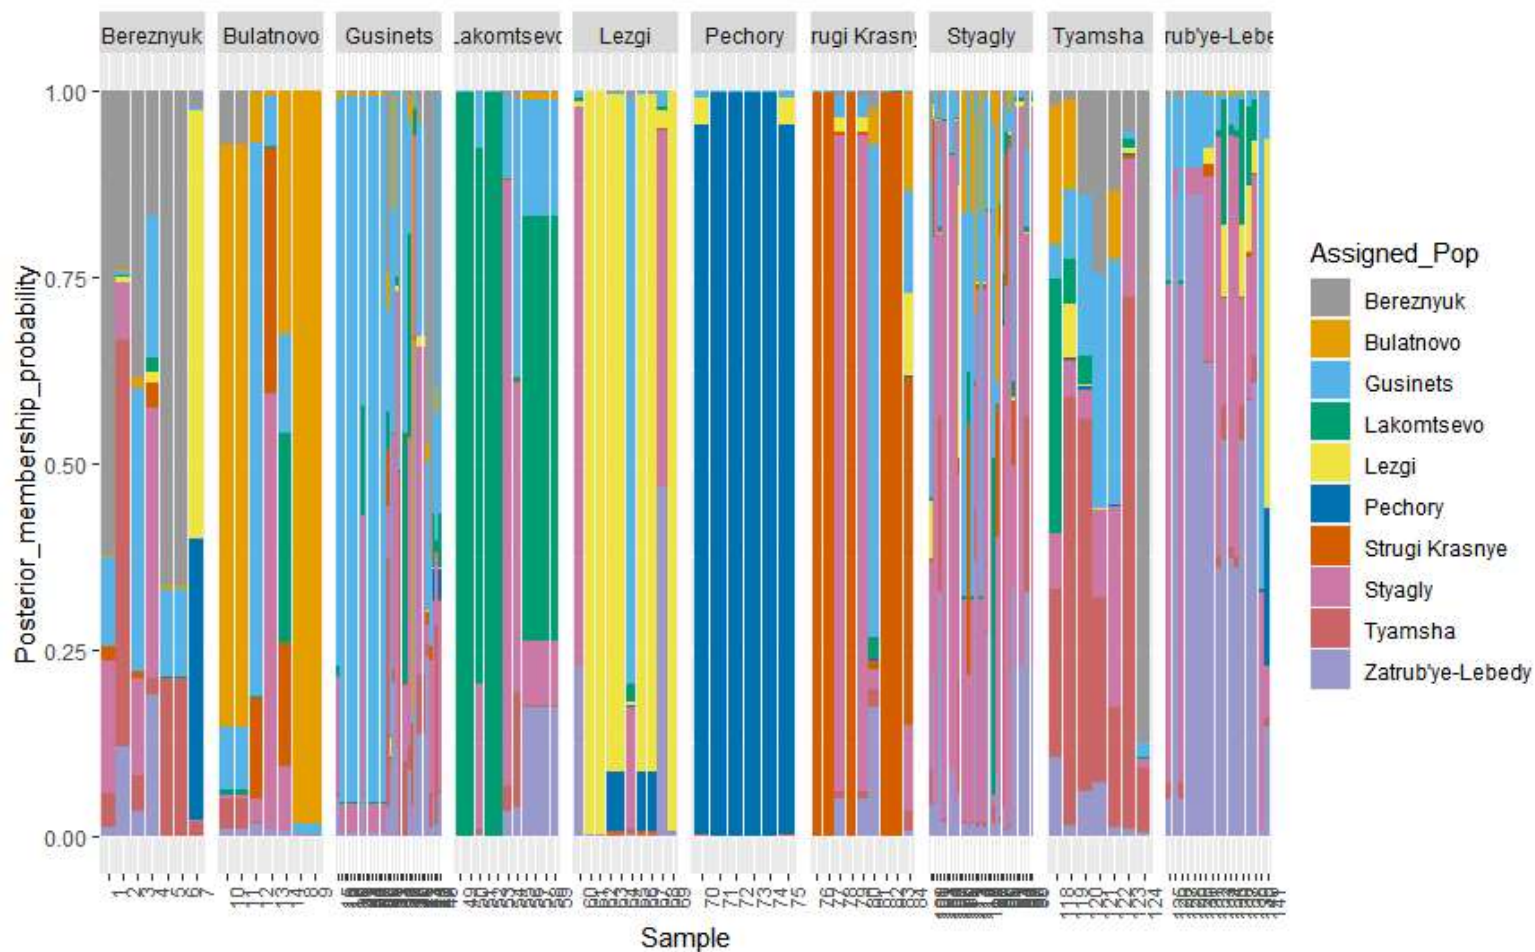

**Figure S2.** A bar plot of data showing the population membership probability assignments of *P. infestans* against their original populations for different locations (non-clone corrected). Bars of the same color represent the likelihood of the same genetic cluster based on analysis of the single sequence repeat marker data. Bars of mixed colors are admixed individuals/isolates.

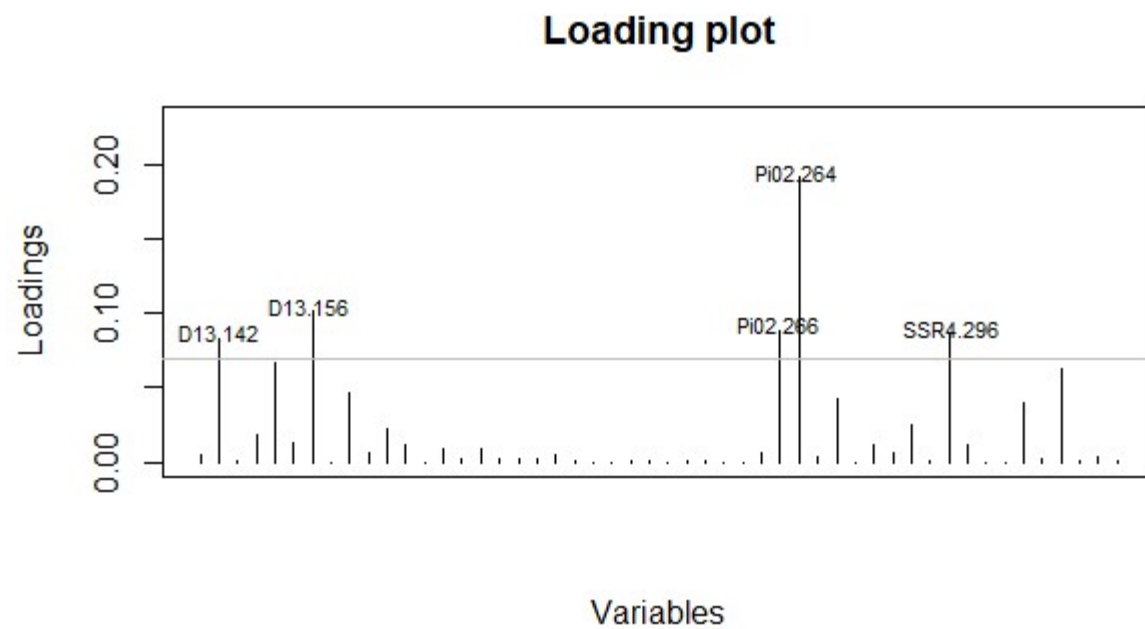

**Figure S3.** Discriminating alleles along axis 1 of discriminant analysis of principal components for locations based on analysis of the single sequence repeat marker data.

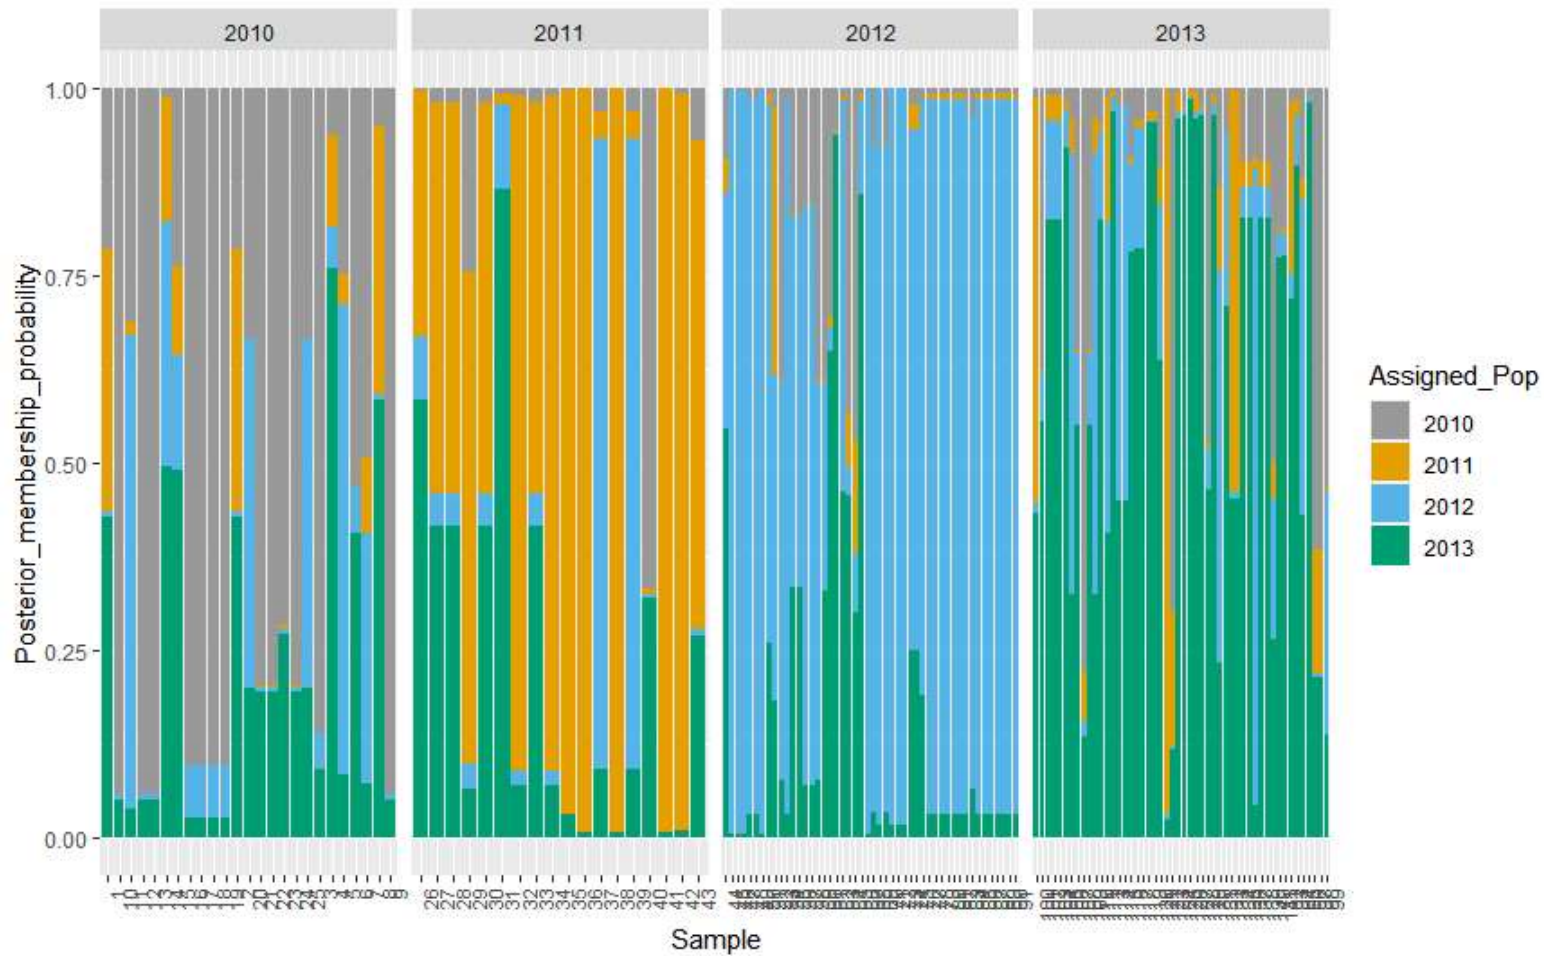

**Figure S4.** A bar plot of data showing the population membership probability assignments of *P. infestans* against their original populations for different years (non-clone corrected). Bars of the same color represent the likelihood of the same genetic cluster based on analysis of the single sequence repeat marker data. Bars of mixed colors are admixed individuals/isolates.

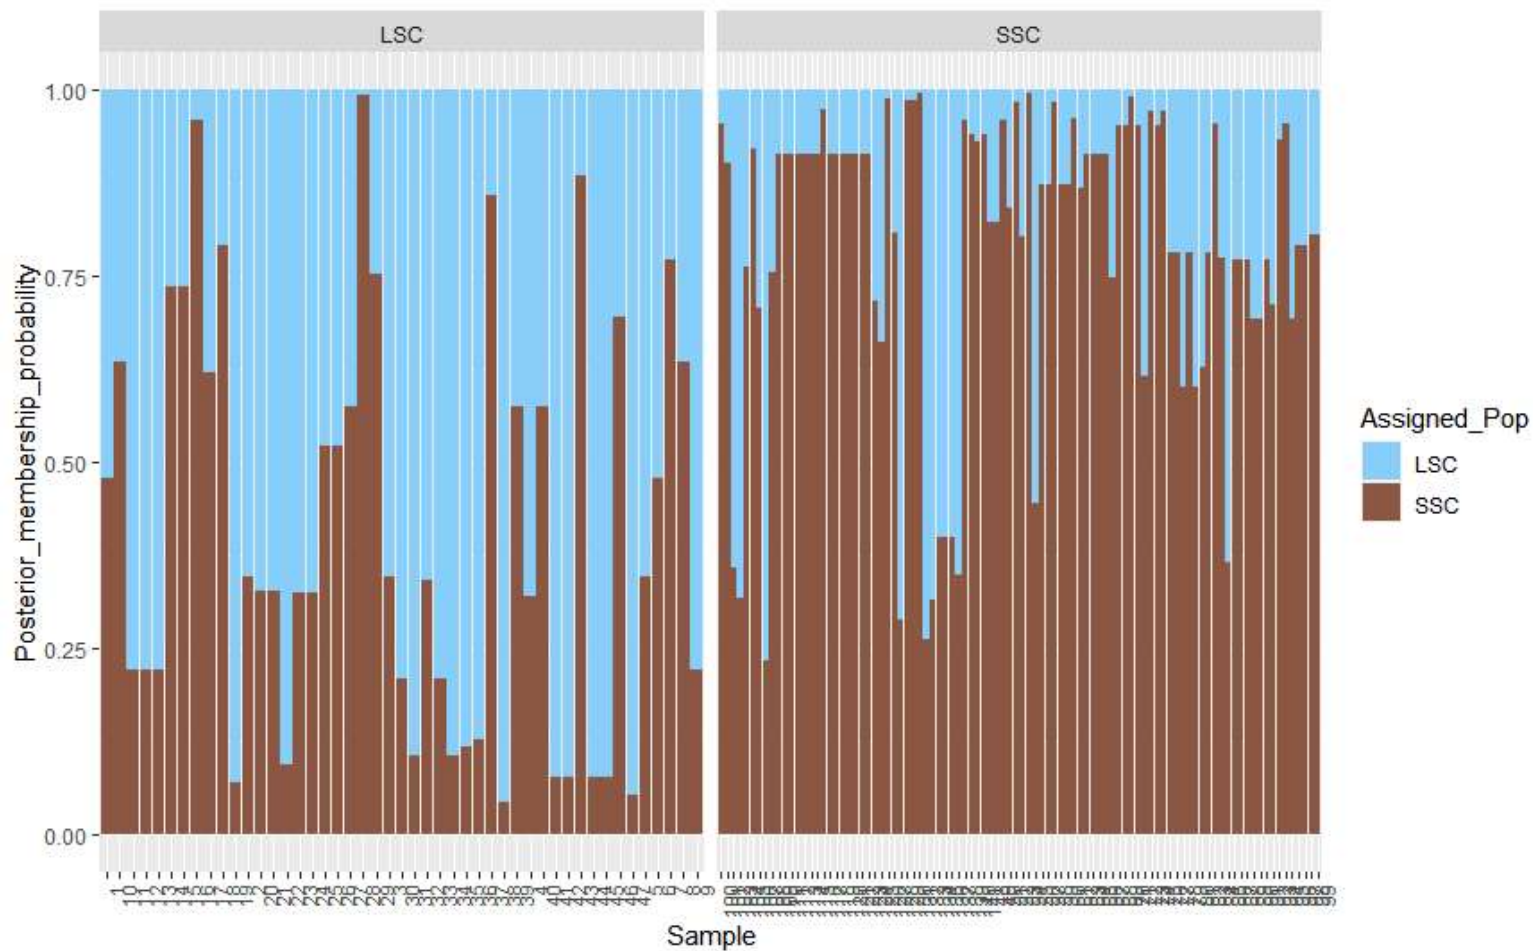

**Figure S5.** A bar plot of data showing the population membership probability assignments of *P. infestans* against their original populations for agricultural management practices (non-clone corrected). Bars of the same color represent the likelihood of the same genetic cluster based on analysis of the single sequence repeat marker data. Bars of mixed colors are admixed individuals/isolates.

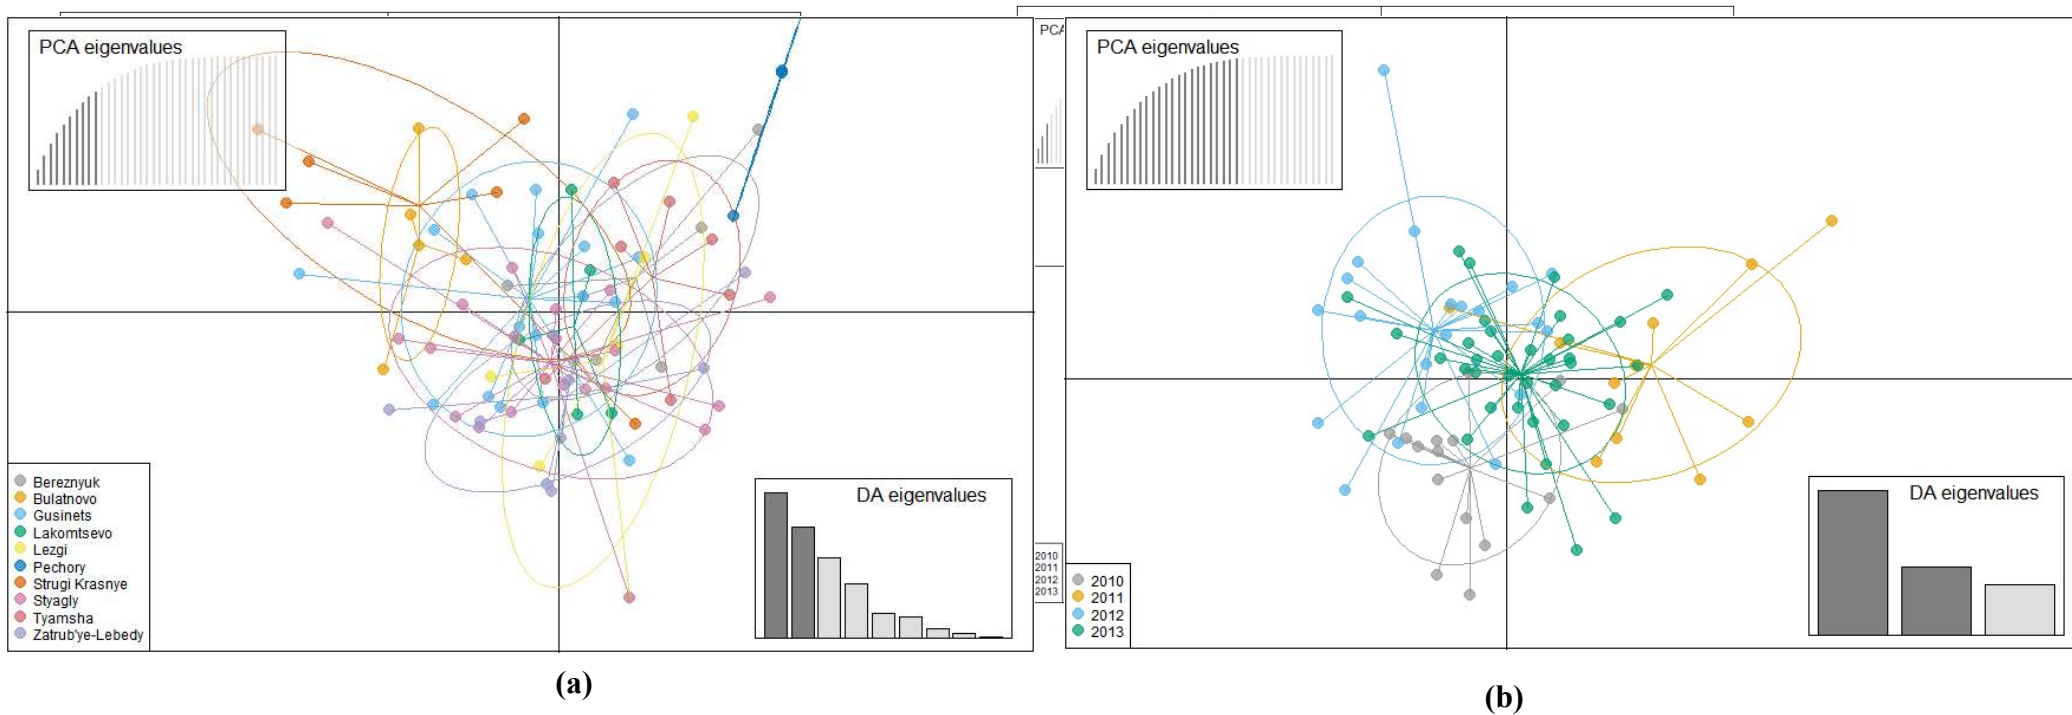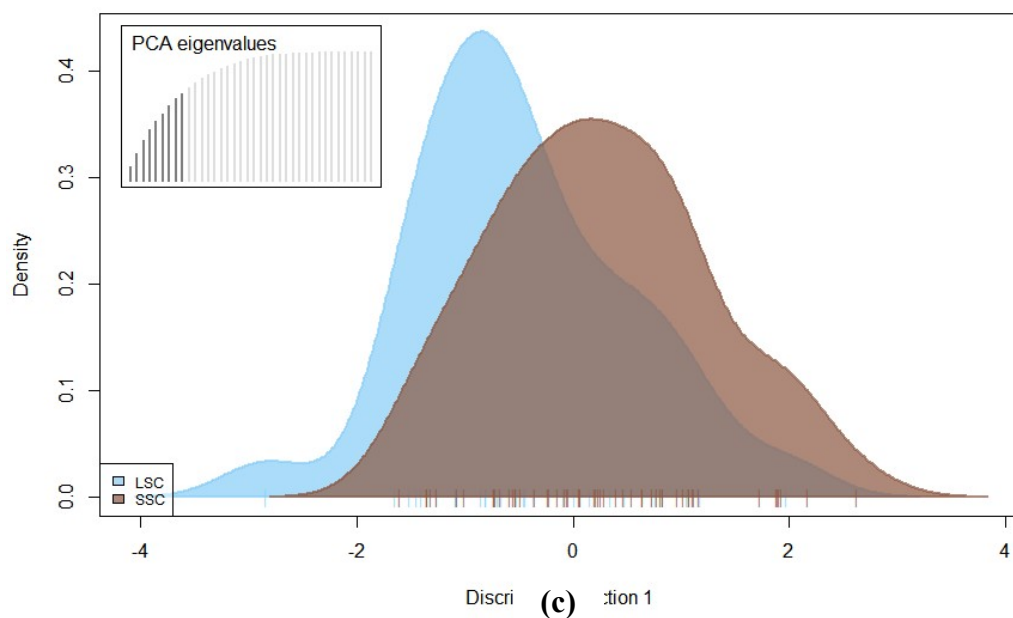

**Figure S6.** A discriminant analysis of the principal components (PC) scatterplot showing clustering of *P. infestans* isolates (clone corrected) according to (a) locations, (b) years, and density plot for (c) agricultural management practices. Scatterplots represent the distribution of individuals along the first two linear discriminants. Clusters are indicated by the color-coded ellipses for (a) and (b). Dots represent multilocus genotypes (in each population). The cross-validated number of the PCs used for the discriminant analysis is shown in the bar plots on the top left of the scatterplot. Indicated at the bottom right corner is the discriminant analysis eigenvalues, respectively. A total of 10, 23, and 9 cross-validated PCs explained 99.4%, 99.3%, and

98.1% of the variation for location, years and agricultural management practices, respectively.

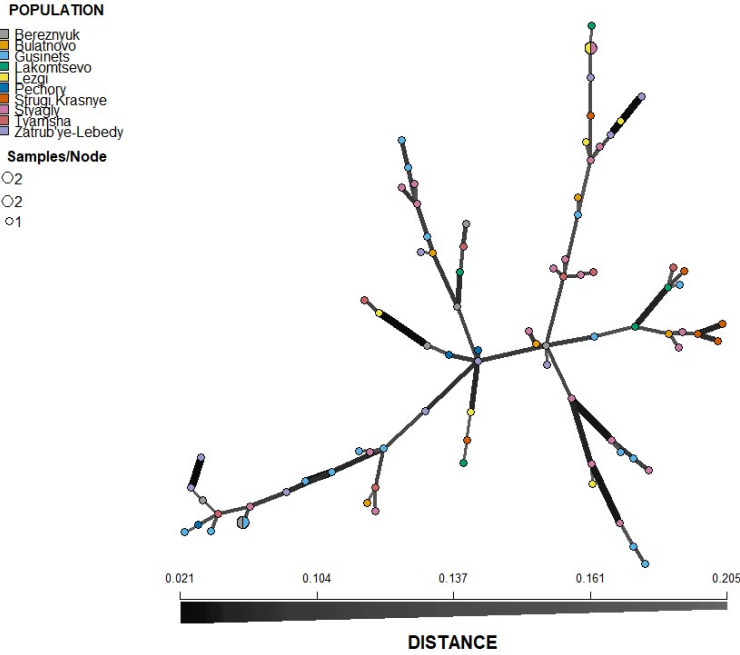

a

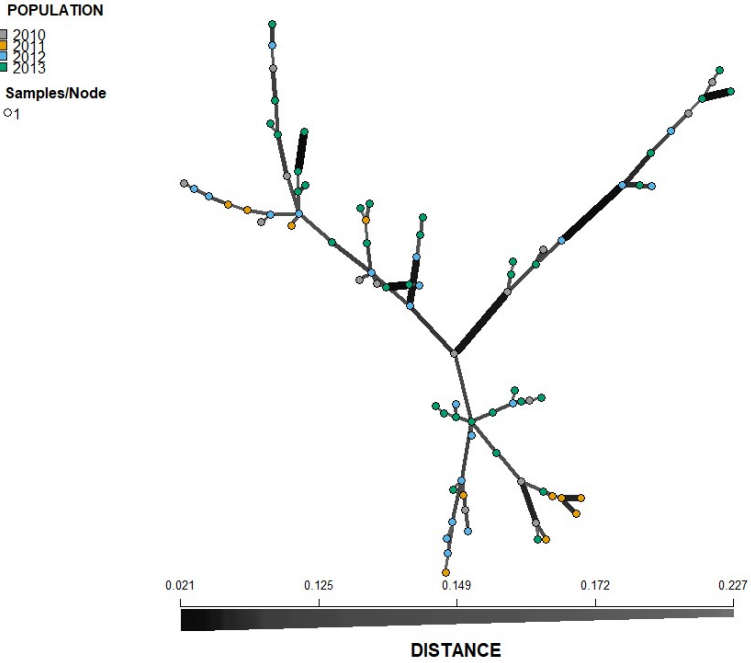

b

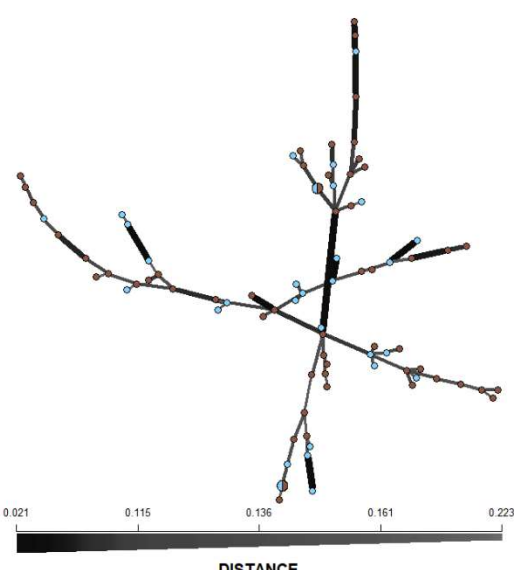

**Figure S7.** Minimum spanning network (MSN) inferred from simple sequence repeat (SSR) markers of *P. infestans* (clone corrected) according to (a) locations, (b) years, and (c) agricultural management practices. Each node represents multilocus genotypes (MLGs) and the size is proportional to the number of individuals sharing the same SSR allele profile. The thickness of the lines represents the Bruvo's genetic distance between two nodes (the further the genetic distance the lighter the color and thinner the line).



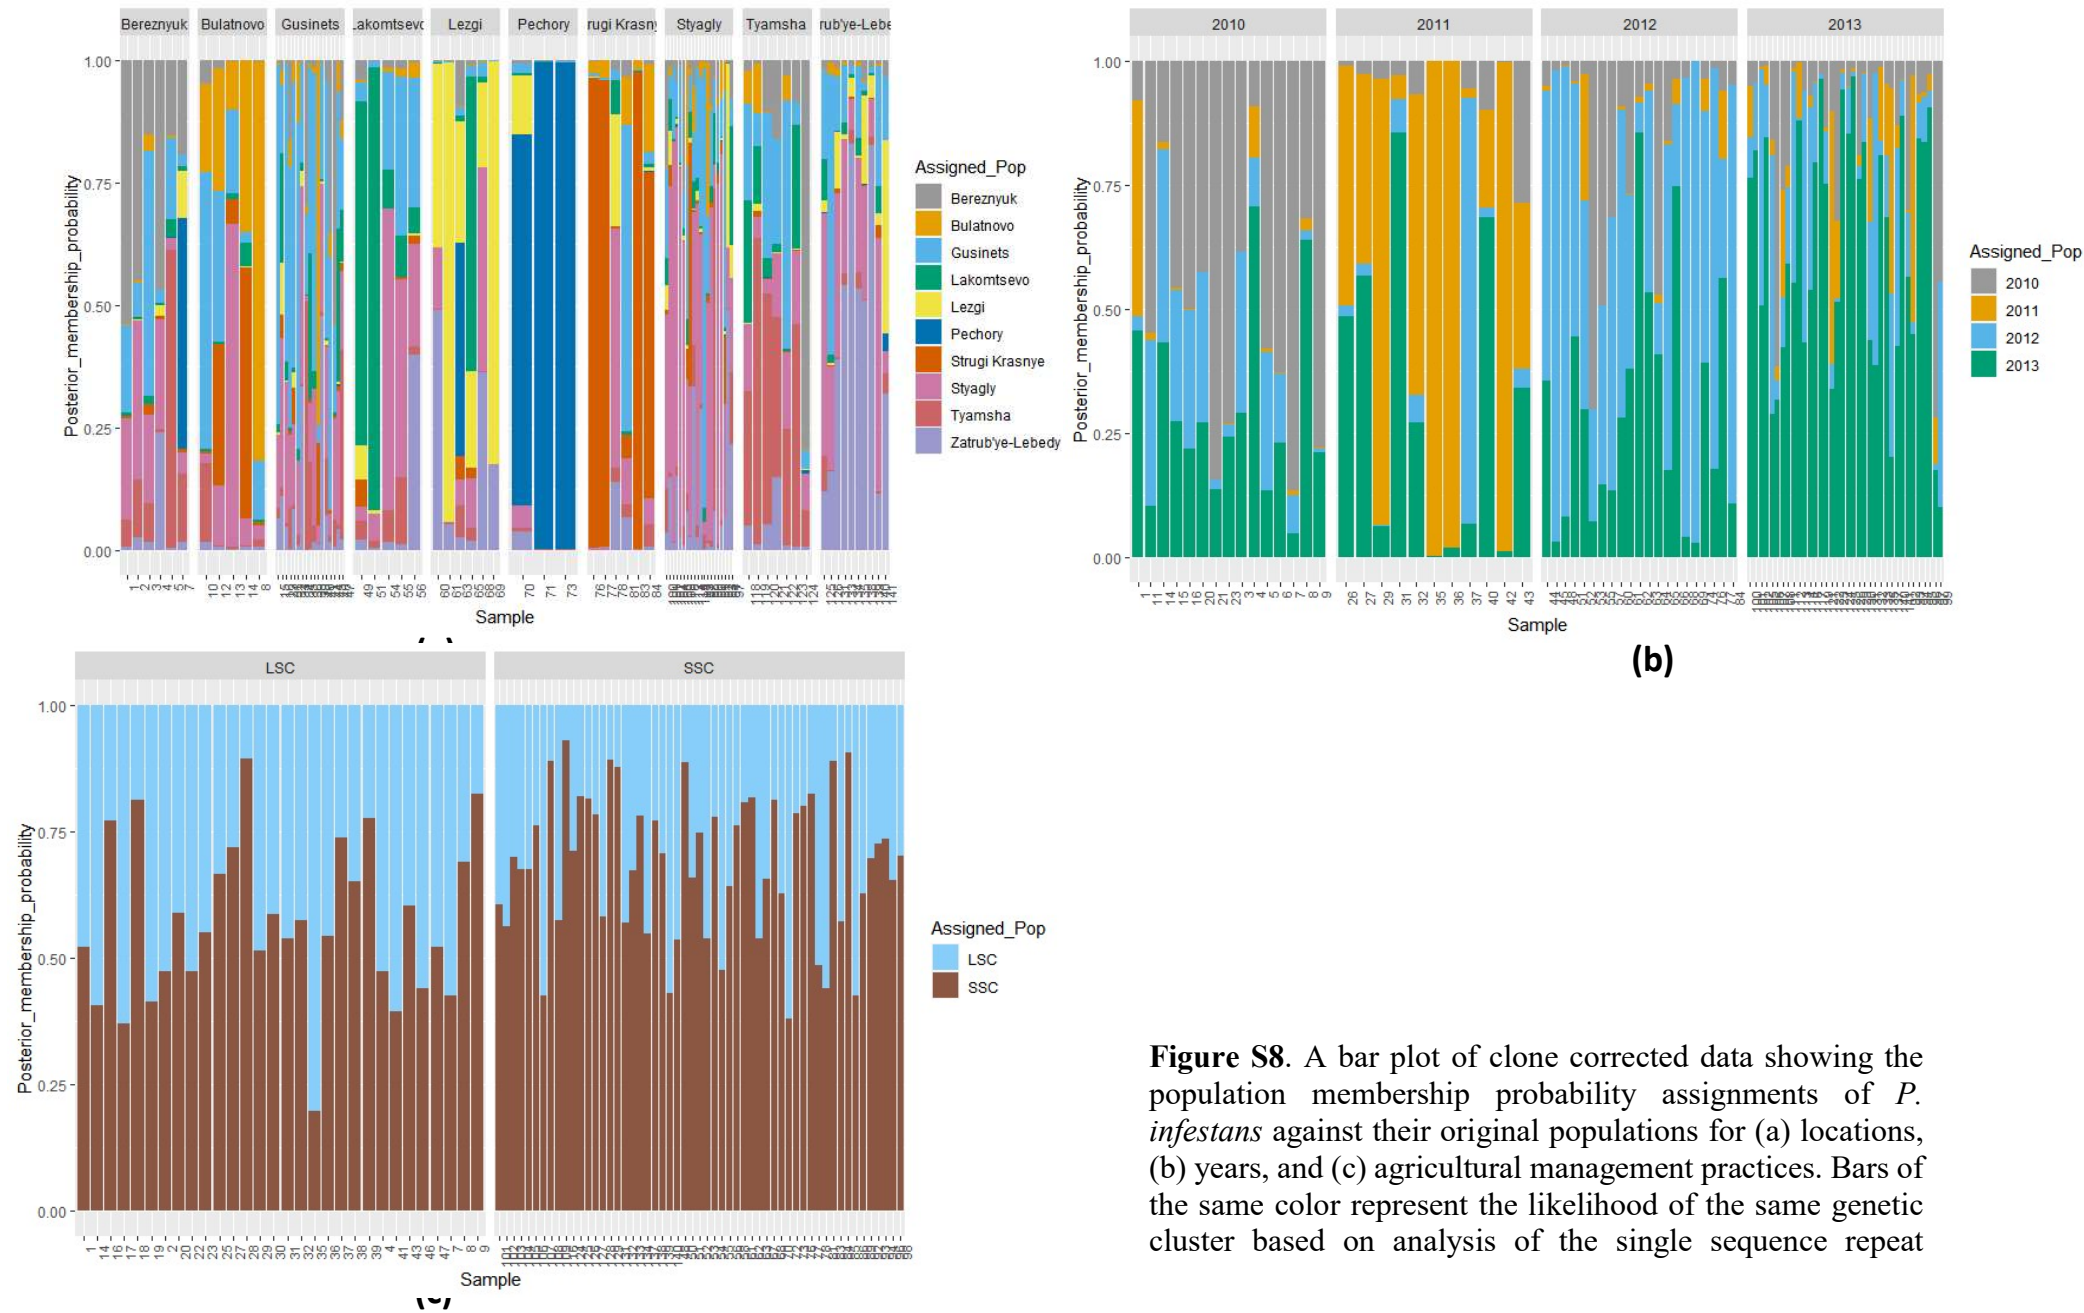

**Figure S8.** A bar plot of clone corrected data showing the population membership probability assignments of *P. infestans* against their original populations for (a) locations, (b) years, and (c) agricultural management practices. Bars of the same color represent the likelihood of the same genetic cluster based on analysis of the single sequence repeat

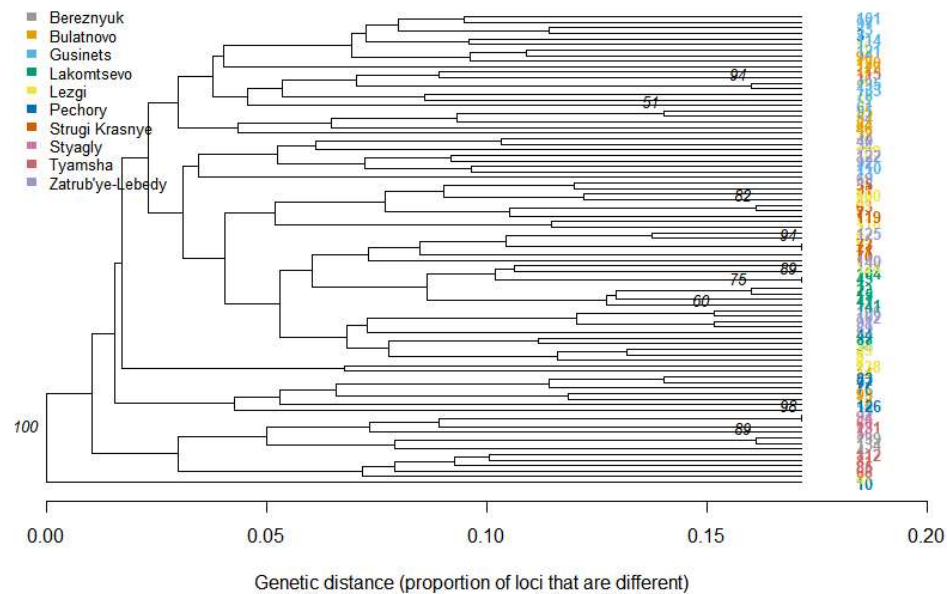

(a)

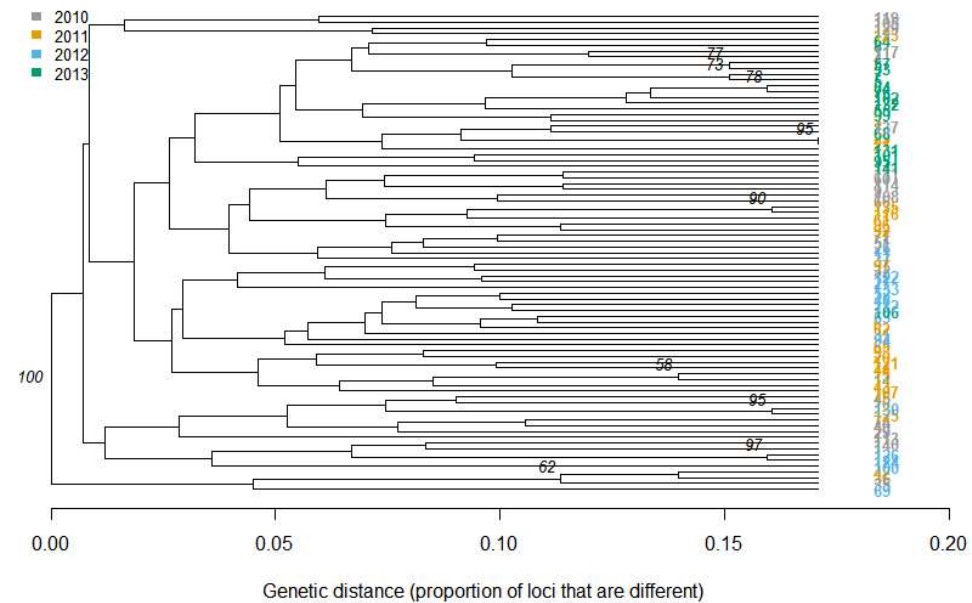

(b)

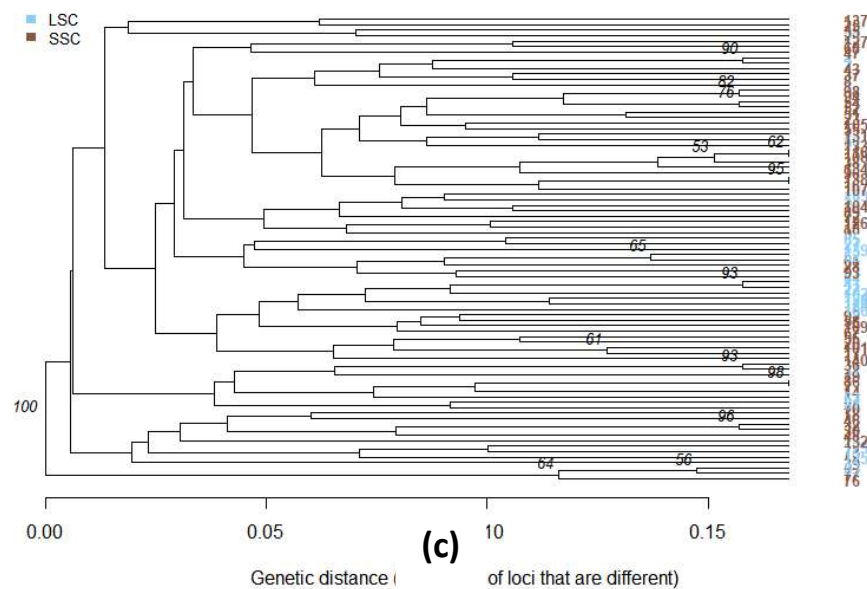

(c)

**Figure S9.** Neighbour-net phylogenetic tree to assess population pattern (clone corrected) on isolate collection at different (a) locations, (b) years, and (c) agricultural management practices. The clusters are color-coded.



**Table S1.** Allele frequencies of SSR markers in 141 *P. infestans* isolates collected in Pskov region from 2010 – 2013.

| SSR locus | Allele | Frequency | SSR locus | Allele | Frequency |
|-----------|--------|-----------|-----------|--------|-----------|
| Pi02      | 258    | 0.089     | SSR4      | 284    | 0.376     |
|           | 264    | 0.067     |           | 288    | 0.167     |
|           | 266    | 0.131     |           | 290    | 0.028     |
|           | 268    | 0.713     |           | 292    | 0.177     |
| D13       | 132    | 0.016     | SSR6      | 294    | 0.167     |
|           | 136    | 0.860     |           | 296    | 0.067     |
|           | 138    | 0.022     |           | 298    | 0.011     |
|           | 140    | 0.027     |           | 302    | 0.007     |
|           | 142    | 0.054     |           | 242    | 0.323     |
| G11       | 156    | 0.011     | SSR8      | 244    | 0.677     |
|           | 158    | 0.011     |           | 260    | 0.528     |
|           | 154    | 0.221     | SSR11     | 264    | 0.018     |
|           | 156    | 0.237     |           | 266    | 0.454     |
|           | 160    | 0.221     |           | 331    | 0.170     |
|           | 162    | 0.195     |           | 341    | 0.504     |
|           | 166    | 0.011     |           | 355    | 0.326     |
|           | 204    | 0.004     | Pi63      | 270    | 0.248     |
| Pi04      | 206    | 0.092     |           | 273    | 0.262     |
|           | 210    | 0.019     |           | 276    | 0.004     |
|           | 166    | 0.348     |           | 279    | 0.486     |

|      |     |       |      |     |       |
|------|-----|-------|------|-----|-------|
|      | 168 | 0.259 | Pi70 | 192 | 0.950 |
|      | 170 | 0.394 |      | 195 | 0.050 |
| Pi4B | 205 | 0.404 | SSR2 | 173 | 0.560 |
|      | 213 | 0.238 |      | 175 | 0.440 |
|      | 215 | 0.004 |      |     |       |
|      | 217 | 0.355 |      |     |       |

---

**Table S2.** Clone corrected standardized index of association ( $r^2_d$ ) within isolates of *P. infestans* sampled at different locations, years and agricultural management practices

| <b>Locations</b>                         | $r^2_d$ | <i>P</i>     |
|------------------------------------------|---------|--------------|
| Total                                    | 0.000   | <b>0.456</b> |
| <b>Years</b>                             | $r^2_d$ | <i>P</i>     |
| 2010                                     | 0.023   | <b>0.083</b> |
| 2011                                     | 0.026   | <b>0.098</b> |
| 2012                                     | 0.023   | <b>0.056</b> |
| 2013                                     | 0.002   | <b>0.557</b> |
| Total                                    | 0.002   | <b>0.625</b> |
| <b>Agricultural management practices</b> | $r^2_d$ | <i>P</i>     |
| LSC                                      | 0.003   | <b>0.262</b> |
| SSC                                      | 0.004   | <b>0.275</b> |
| Total                                    | 0.000   | <b>0.500</b> |

Bold *P* values ( $P > 0.05$ ) indicate random mating is supported by the test.  $r^2_d$ , standardized index of association. Nb: an analysis was only performed for all locations together because of the low number of isolates in most of the locations.
